# Supplementary material for: Tuning Eu2+ luminescence in Sr8CaLu (PO4)7via Na+-induced local structure engineering for violet-chip-excitable full-spectrum lighting
Source: Royal Society of Chemistry journal article supplement (doi:10.1039/d3qi02377j), 2023-12-04
Supplement: d3qi02377j1.zip [file d3qi02377j1.zip]

**Electronic Supplementary Material**

**Tuning Eu2+ luminescence in Sr8CaLu (PO4)7 via Na+-induced local structure engineering for violet-chip-excitable full-spectrum lighting**

Luan Yang 1, Fengluan You 1, Tao Pang 2, Xifeng Pan 1, *, Shaoxiong Wang 1, Shilin Jin 1, Yongzheng Fang 3,*, Daqin Chen 1,4,5,*

1College of Physics and Energy, Fujian Normal University, Fuzhou, 350117, P. R. China

*E-mail: panxifeng@fjnu.edu.cn (X. F. Pan); [dqchen@fjnu.edu.cn](mailto:dqchen@fjnu.edu.cn) (D. Q. Chen)

2Huzhou Key Laboratory of Materials for Energy Conversion and Storage, College of

Science, Huzhou University, Zhejiang, Huzhou 313000, P. R. China

3School of Materials Science and Engineering, Shanghai Institute of Technology, Shanghai 201418, P. R. China

*E-mail: [fyz1003@sina.com](mailto:fyz1003@sina.com)

4Fujian Provincial Collaborative Innovation Center for Advanced High-Field Superconducting Materials and Engineering, Fujian Normal University, Fuzhou, Fujian 350117, P. R. China

5Fujian Provincial Engineering Technology Research Center of Solar Energy Conversion and Energy Storage, Fujian Normal University, Fuzhou, Fujian 350117, P. R. China

**a**

**b**

**c**

**e**

**d**

**Figure S1** **(a)** XRD patterns for theEu: SCLP and Eu: Na-SCLP phosphors with increase of Na+ concentrations (from bottom to top).Rietveld refinement results for the **(b)** Eu: SCLP and Eu: Na-SCLP phosphors with various Na+ doping concentrations: **(c)** 2.0 mol%, **(d)** 3.3 mol% and **(e)** 9.6 mol%.

**Figure S2** PL spectra for the Eu: SCLP samples doped with various Eu2+ concentrations, showing the optimal Eu2+ concentration of 7 mol%.

**Figure S3** Diffuse reflection spectra of un-doped SCLP and Eu: SCLP samples with different Eu2+ concentrations.

·

**Figure S4** PL spectra for the Eu: Na-SCLP samples doped with various Na+ concentrations, showing gradual red-shifting of PL band.


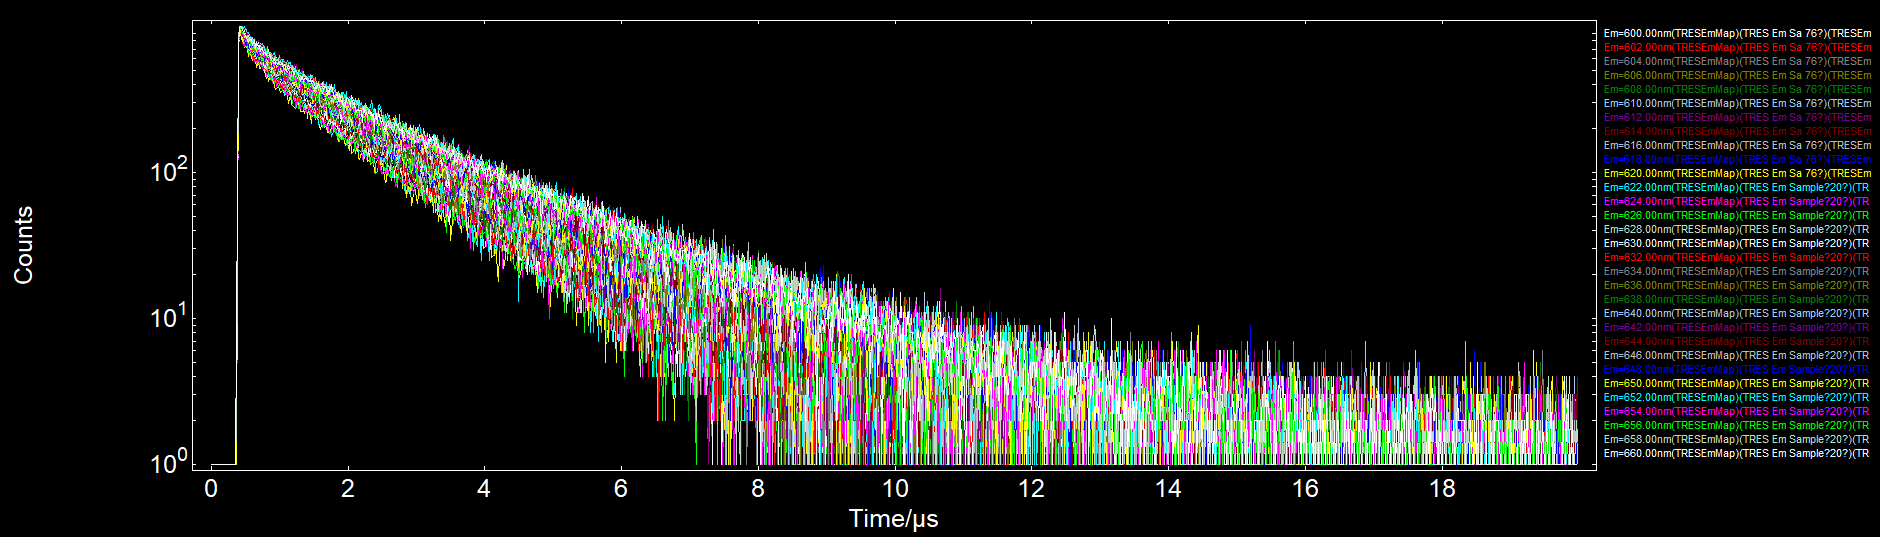


**Figure S5** TRPL spectra recorded by monitoring Eu2+ emission from 470 nm to 660 nm with a step of 2 nm for a typica Eu: Na-SCLP sample.


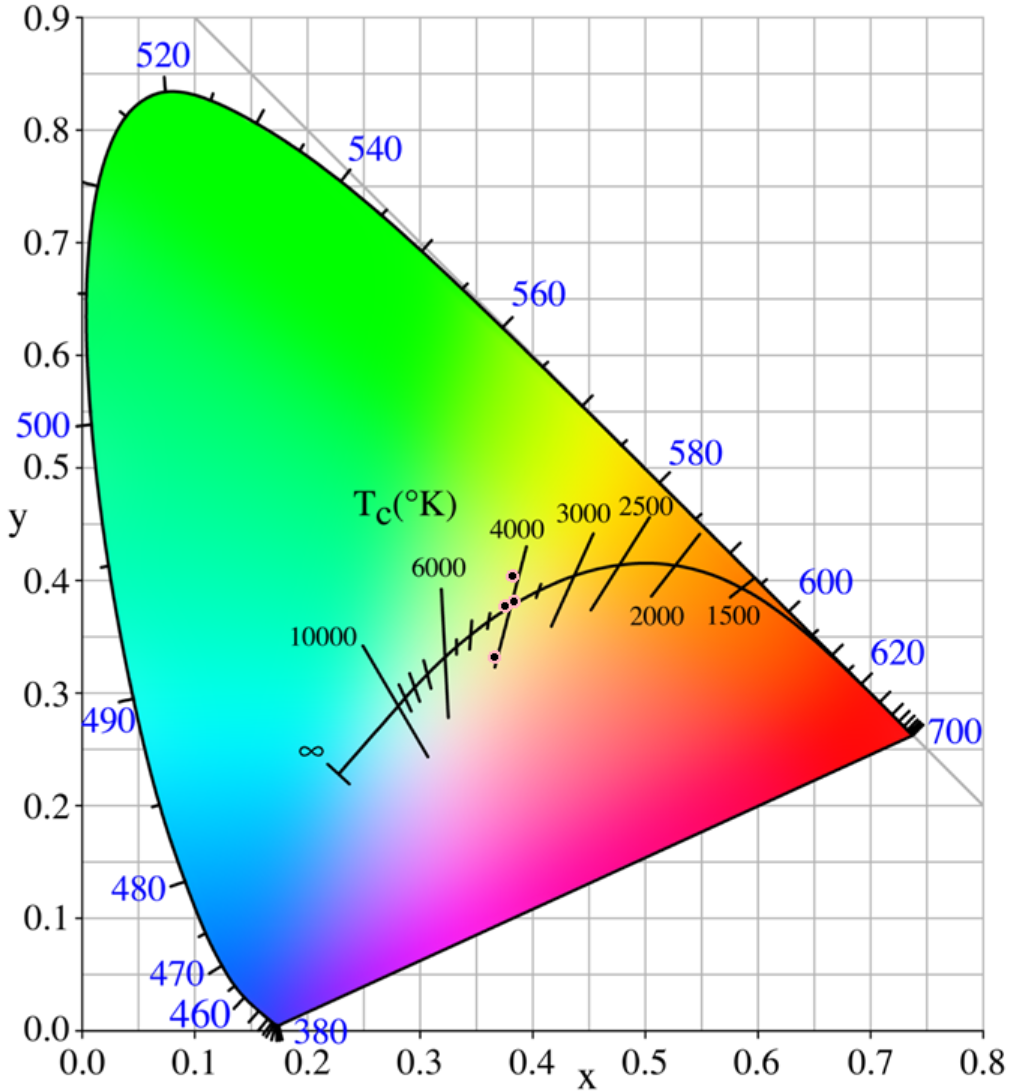


(0.367，0.332)

(0.384，0.381)

(0.375，0.378)

(0.383，0.403)

**Figure S6** CIE color coordinates for the designed wLEDs based on Eu: Na-SCLP phosphors with different Na+ concentrations.

**Figure S7** R10 values of the corresponding wLEDs based on Eu: Na-SCLP phosphors with different Na+ concentrations.

**Figure S8** Normalized EL spectra for a typical wLED with increase of operating current.

**Table S1** PL wavelength, FWHM, decay lifetime, PLQY) for the Eu2+: Na-SCLP samples with varied Na+ doping contents.

| **Na+ contents**  **(mol%)** | **PL wavelength (nm)** | **FWHM**  **(nm)** | **Decay lifetime**  **(ns)** | **PLQY**  **(%)** |
| --- | --- | --- | --- | --- |
| **0.28** | 520 | 114 | 1255 | 62.06 |
| **1.56** | 522 | 118 | 1369 | 74.97 |
| **1.98** | 527 | 130 | 1451 | 72.54 |
| **2.82** | 529 | 131 | 1479 | 73.69 |
| **3.08** | 536 | 141 | 1580 | 74.53 |
| **3.33** | 539 | 149 | 1596 | 77.81 |
| **3.96** | 547 | 154 | 1670 | 77.65 |
| **4.58** | 549 | 163 | 1722 | 76.07 |
| **5.21** | 550 | 158 | 1697 | 60.18 |
| **6.66** | 553 | 161 | 1738 | 64.12 |
| **9.56** | 554 | 170 | 1741 | 62.68 |
| **9.12** | 555 | 161 | 1747 | 63.51 |
| **8.68** | 556 | 173 | 1841 | 63.25 |
